# Supplementary material for: Synthesis of small-sized intermetallic PtCo fuel cell catalysts by promoting inner surface utilization of carbon supports
Source: Royal Society of Chemistry journal article supplement (doi:10.1039/d3qm00312d), 2023-01-01
Supplement: d3qm00312d1.pdf [file d3qm00312d1.pdf]

## Electronic Supplementary Information

### **Synthesis of small-sized intermetallic PtCo fuel cell catalysts by promoting inner surface utilization of carbon supports**

Xiaoran Niu,<sup>a,b</sup> Ru-Yang Shao,<sup>b</sup> Le Zhang,<sup>b</sup> Cong Xu,<sup>b</sup> Tian-Wei Song,<sup>b</sup> Peng Yin,<sup>b</sup> Lei Tong,<sup>\*b</sup> Chenliang Su<sup>a</sup> and Hai-Wei Liang<sup>\*b</sup>

<sup>a</sup>International Collaborative Laboratory of 2D Materials for Optoelectronic Science & Technology of Ministry of Education, Institute of Microscale Optoelectronics, Shenzhen University, Shenzhen 518060, China;

<sup>b</sup>Hefei National Research Center for Physical Sciences at the Microscale, Department of Chemistry, University of Science and Technology of China, Hefei, 230026, China.

E-mail: ltong17@mail.ustc.edu.cn (L. Tong); hwliang@ustc.edu.cn (H.-W. Liang).

**Synthesis of MC support.** In a typical synthesis,<sup>1</sup> 1.0 g of benzene-1,2,4,5- tetracarboxylic acid (marked as BTAA) was first dispersed in 100 mL of deionized water containing Mg(OH)<sub>2</sub>. The mole ratio of Mg(OH)<sub>2</sub> to BTAA was 2:1. The solution was stirred for 1 h at 100 °C before rotary evaporation to obtain the powder. Then the collected powder was transferred into a corundum crucible and the furnace was ramped from room temperature to 800 °C at a heating rate of 10 °C min<sup>-1</sup> and held for 2 h under flowing N<sub>2</sub>. After cooling to room temperature, the carbonized product was washed with 1 M HCl solution and deionized water several times to remove metal species. The wet carbon products were finally dried at 60 °C overnight, marked as MC.

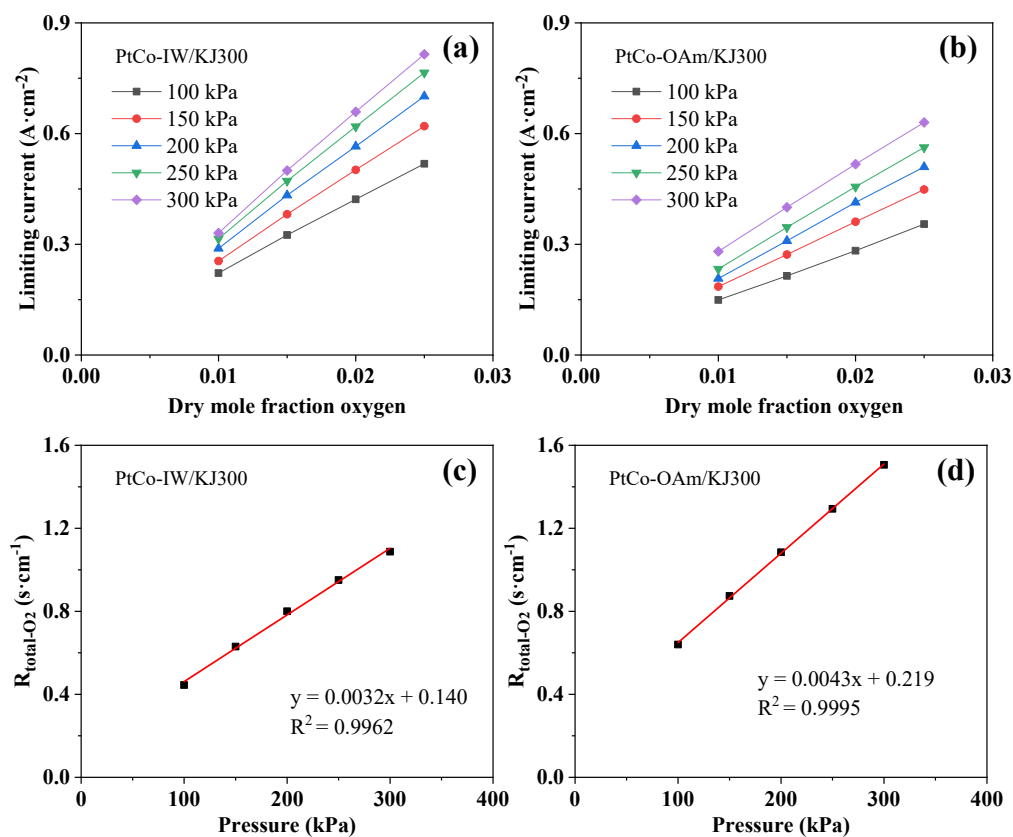

**Figure S1.** Limiting current as a function of dry mole fraction of oxygen for five different total pressures in a cell with the cathode catalysts of PtCo-IW/KJ300 (a) or PtCo-OAm/KJ300 (b). Total O<sub>2</sub> transport resistance (R<sub>Total-O<sub>2</sub></sub>) as a function of total reactant gas pressure for MEAs made with the cathode catalysts of PtCo-IW/KJ300 (c) or PtCo-OAm/KJ300 (d).

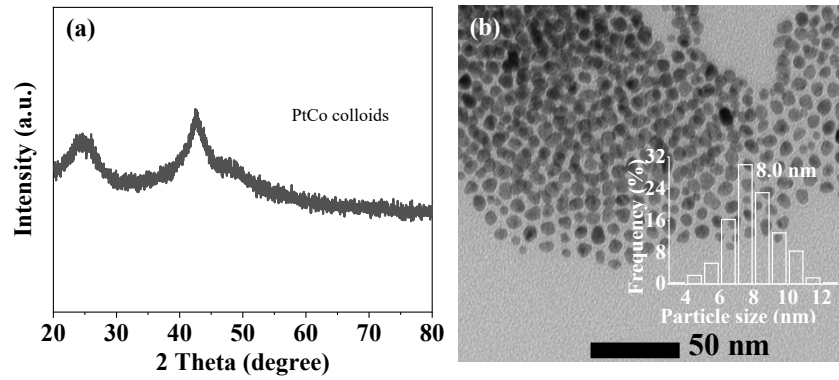

**Figure S2.** XRD pattern (a) and TEM image (b) of PtCo colloids prepared from OAm method. The inserted histogram is the corresponding statistics of PtCo NPs size distributions.

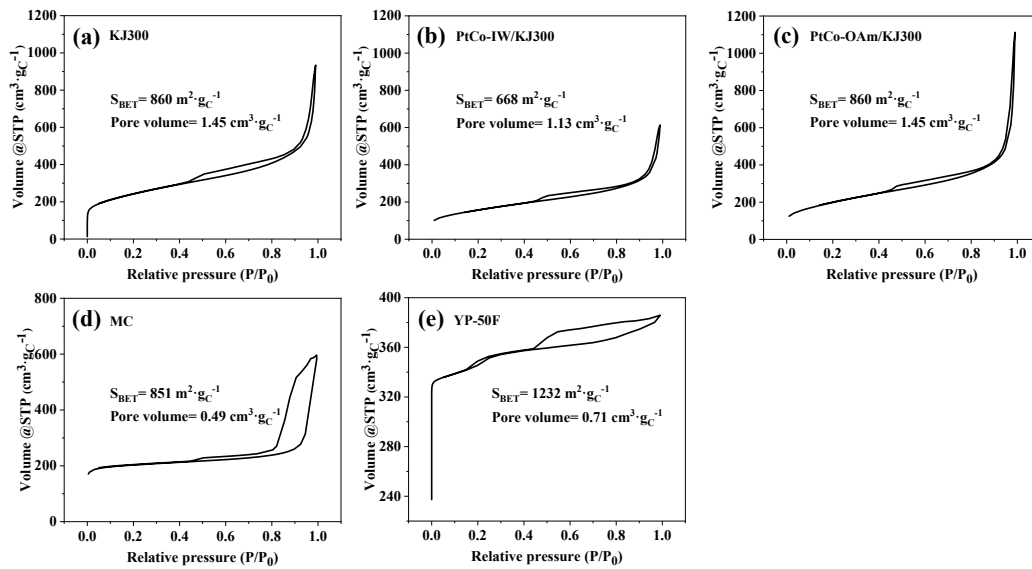

**Figure S3.** Nitrogen sorption isotherms of KJ300(a), PtCo-IW/KJ300 (b), PtCo-OAm/KJ300 (c), MC (d), and YP-50F (e).

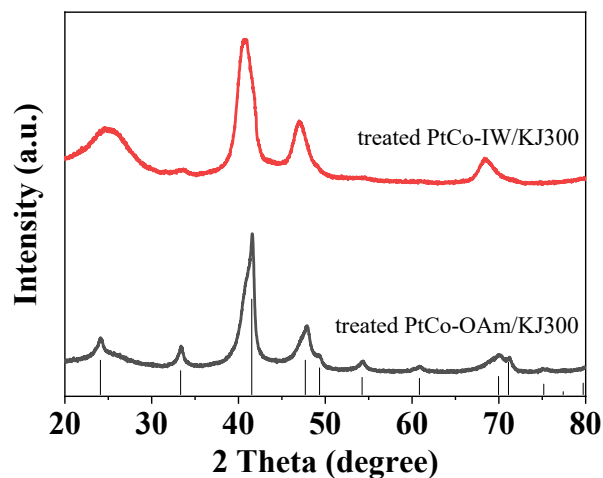

**Figure S4.** XRD patterns of treated PtCo-IW/KJ300 and PtCo-OAm/KJ300

**Table S1.** Test stand protocol for limiting current measurements. Every mole fraction of oxygen was run at each pressure.

| Temperature (°C) | Outlet pressure (kPa) | Relative humidity (%) | Dry mole fraction O <sub>2</sub> |
|------------------|-----------------------|-----------------------|----------------------------------|
| 80               | 100                   | 70                    | 0.010                            |
|                  | 150                   |                       | 0.015                            |
|                  | 200                   |                       | 0.020                            |
|                  | 250                   |                       | 0.025                            |
|                  | 300                   |                       |                                  |

**Table S2.** Size and metal content of prepared catalysts.

| Catalysts      | Particle size <sup>1</sup> (nm) | Particle size <sup>2</sup> (nm) | Pt(wt%) <sup>3</sup> | Co(wt%) <sup>3</sup> |
|----------------|---------------------------------|---------------------------------|----------------------|----------------------|
| PtCo-IW/KJ300  | 4.5                             | 4.6                             | 14.6                 | 4.3                  |
| PtCo-OAm/KJ300 | 13.1                            | 11.0                            | 14.1                 | 4.0                  |
| PtCo-IW/MC     | 11.9                            | 10.6                            | 14.5                 | 4.1                  |
| PtCo-IW/YP-50F | 8.7                             | 8.0                             | 14.0                 | 4.1                  |

<sup>1</sup> Estimation of the main peak at 41.6° by the Debye-Scherrer equation based on XRD data

<sup>2</sup> Statistics analysis from HADDF-STEM images

<sup>3</sup> ICP-AES measurement

**Table S3.** ICP-AES results for metal content of treated catalysts

| Catalysts              | Pt(wt%) | Co(wt%) | Pt/Co |
|------------------------|---------|---------|-------|
| treated PtCo-IW/KJ300  | 13.4    | 2.5     | 1.6   |
| treated PtCo-OAm/KJ300 | 13.9    | 2.7     | 1.5   |

## References

- 1 L. Tong, Q. Q. Yang, S. Li, L. Le Zhang, W. J. Zeng, Y. W. Ding, L. Fan and H. W. Liang, Building the Bridge of Small Organic Molecules to Porous Carbons via Ionic Solid Principle, *Nano Res.*, 2022, **16**, 80–87.
